# Supplementary material for: Comparison of protective coatings prepared from various trialkoxysilanes and possibilities of spectroelectrochemical approaches for their investigation
Source: publisher site journal article supplement (doi:10.1515/corrrev-2022-0007), 2022-08-13
Supplement: Supplementary file 1 [file j_corrrev-2022-0007_suppl.docx]

**Supplementary Material**

**Comparison of protective coatings prepared from various trialkoxysilanes and possibilities of spectroelectrochemical approaches for their investigation**

Angelja K. Surca and Mirjana Rodošek

DOI 10.1515/corrrev-2022-0007

**Supplementary Table S1:** Precursors used for the preparation of trialkoxysilane-, PDMS and PDMSTU-based coatings and, references of concerned works.

| **Coating** | **Precursors** | **References** |
| --- | --- | --- |
| MPTMS | - (3-mercaptopropyl)trimethoxysilane   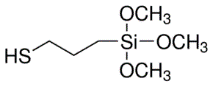 | Mihelčič et al. 2017 |
| BTMSE | - 1,2-bis(trimethoxysilyl)ethane | Rodošek et al. 2016 |
| PDMSU | - Bis-trialkoxysilyl-ureido-functionalised-PDMS | Fir et al. 2007;  Šurca Vuk et al. 2008 |
| PDMSTU | - Bis-trialkoxysilyl-thioureido-functionalised-PDMS      - Bis(triethoxysilylpropyl)tetrasulfide   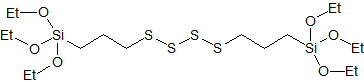   - Trisilanol-heptaisooctyl-POSS   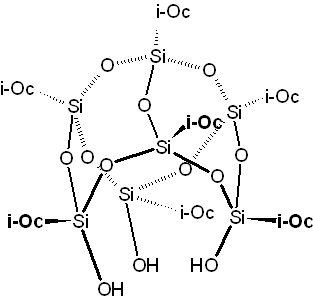 | Surca et al. 2017 |

**Supplementary Table S2:** Precursors used for the preparation of sol-gel/epoxy coatings and references of concerned works.

| **Coating** | **Precursors** | **References** |
| --- | --- | --- |
| GPTMS/AP4iBu4POSS | - (3-glycidyloxypropyl)trimethoxysilane   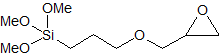   - Tetraaminopropyl-tetraisobutyl-POSS | Jerman et al. 2011 |
| GPTMS/APTMS/POSS/NH2PDMSNH2 | - (3-glycidyloxypropyl)trimethoxysilane   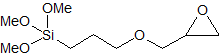   - (3-aminopropyl)trimethoxysilane      - Aminopropyl-heptaisooctyl-POSS      - H2N-PDMS-NH2   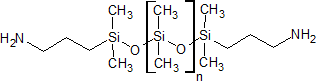 | Rauter et al. 2013 |
| EP-PDMS-EP/APTMS/APiOc7POSS | - EP-PDMS-EP      - (3-aminopropyl)trimethoxysilane      - Aminopropyl-heptaisooctyl-POSS | Rodošek et al. 2014 |

**Supplementary Table S3:** Precursors used for the preparation of trialkoxysilyl-functionalized cyclic tetrasilsesquioxane-based coatings and the reference of the concerned work.

| Coating | **Precursors** | **References** |
| --- | --- | --- |
| CS4 | - Trialkoxysilyl-functionalized cyclic tetrasilsesquioxane | Rodošek et al. 2017 |
| CS4/BTMSE | - Trialkoxysilyl-functionalized cyclic tetrasilsesquioxane - Bis(trimethoxysilyl)ethane (BTMS) | Rodošek et al. 2017 |
| CS4/BTMSE | - Trialkoxysilyl-functionalized cyclic tetrasilsesquioxane - Bis(trimethoxysilyl)ethane - And one of 5 additives   - dimethyldiethoxysilane (DMDES)  - phenyltrimethoxysilane (PhTMS)  - isooctyl trimethoxysilane (IOTMS)  - hexadecyltrimethoxysilane (HDTMS)  - 1H,1H,2H,2H-  perfluorooctyltriethoxysilane (PFOTES) | Rodošek et al. 2017 |
